# Supplementary material for: Evaluation the effect of Gum Arabic as prophylactic agent against chemotherapy-induced oral mucositis in cancer patients: A clinical trial
Source: Research Square preprint supplement (doi:10.21203/rs.3.rs-2166645/v1), 2022-10-31

**Evaluation the effect of Gum Arabic as prophylactic agent against chemotherapy-induced oral mucositis in cancer patients: A clinical trial**

Abdulrazzaq Yahya Al khazzan1*, Abdel-Wahab Hasan Mohamed2, Ali Elbagir Eltayib3 & Waheeb Saleem Suliman4

1University of Science and Technology, Clinical Pharmacy & Pharmacy Practice, Sana’a, 11111. Yemen.

2Omdurman Islamic University, Clinical pharmacology, Sudan

3Khartoum Oncology Hospital, Clinical oncology, Khartoum, 11111, Sudan

4Agricultural Research Corporation, Wad Madani, Sudan

[***Corresponding author:** abdulrazzagy@gmail.com](mailto:*a.alkhazzan@ust.edu)

**Table 1** Chi-Square tests results for Cancer type * Presence or absence of oral mucositis during six weeks for all patients.

|  | GA-treated group | | | Control group | | |
| --- | --- | --- | --- | --- | --- | --- |
| Week | **df** | **Value (χ2)** | **Sig. (P. value)** | **df** | **Value (χ2)** | **Sig. (P. value)** |
| First | 9 | 5.087 | .827 | 9 | 16.926 | .050 |
| Second | 9 | 8.400 | .494 | 9 | 14.577 | .103 |
| Third | 9 | 8.018 | .532 | 9 | 4.414 | .882 |
| Fourth | 9 | 5.498 | .789 | 9 | 2.539 | .980 |
| Fifth | 9 | 5.579 | .781 | 9 | 12.003 | .213 |
| Sixth | 9 | 3.173 | .957 | 9 | 10.606 | .304 |

**Table 2** Chi-Square tests results for Chemotherapy type * Presence or absence of oral mucositis during six weeks for all patients.

|  | GA-treated group | | | Control group | | |
| --- | --- | --- | --- | --- | --- | --- |
| Week | **df** | **Value (χ2)** | **Sig. (P. value)** | **df** | **Value (χ2)** | **Sig. (P. value)** |
| First | 64 | 50.607 | .888 | 47 | 49.113 | .388 |
| Second | 65 | 83.026 | .065 | 46 | 45.771 | .482 |
| Third | 66 | 70.265 | .337 | 46 | 50.370 | .305 |
| Fourth | 65 | 48.214 | .941 | 45 | 46.889 | .395 |
| Fifth | 59 | 65.857 | .252 | 44 | 42.426 | .539 |
| Sixth | 63 | 83.475 | .043 | 45 | 38.889 | .727 |

**Table 3** Cancer locations within 392 of participants in this study.

| **No.** | **Tumor type location** | **Frequency** | **Percent (%)** |
| --- | --- | --- | --- |
| 1. | Abdominal Lymph Node | 2 | .5 |
| 2. | Adrecort | 1 | .3 |
| 3. | Anal | 2 | .5 |
| 4. | Backbone | 1 | .3 |
| 5. | Bowel | 1 | .3 |
| 6. | Breast | 14 | 3.6 |
| 7. | Bronchus | 1 | .3 |
| 8. | Buccal mucosa | 1 | .3 |
| 9. | Carcinoid | 1 | .3 |
| 10. | Cervical | 1 | .3 |
| 11. | Cervix | 10 | 2.6 |
| 12. | Cholangiocarcinoma | 2 | .5 |
| 13. | CLL | 3 | .8 |
| 14. | Colon | 4 | 1.0 |
| 15. | Colorectal | 1 | .3 |
| 16. | CysticTeratoma | 1 | .3 |
| 17. | DSL | 1 | .3 |
| 18. | Endometrium | 5 | 1.3 |
| 19. | Esophagus | 21 | 5.4 |
| 20. | Ethmoid Sinus | 1 | .3 |
| 21. | Fibromatosis | 1 | .3 |
| 22. | FibroSarcoma | 1 | .3 |
| 23. | GITcardi | 1 | .3 |
| 24. | GOJ | 1 | .3 |
| 25. | HCC | 5 | 1.3 |
| 26. | Hydatidiform mole | 2 | .5 |
| 27. | Kaposi sarcoma | 1 | .3 |
| 28. | Larynx | 6 | 1.5 |
| 29. | Liver metastasis | 1 | .3 |
| 30. | Lower Lip | 2 | .5 |
| 31. | Lt bladder | 1 | .3 |
| 32. | Lt breast | 60 | 15.3 |
| 33. | Lt neck | 1 | .3 |
| 34. | Lung | 9 | 2.3 |
| 35. | Lymphoma | 2 | .5 |
| 36. | Melanoma | 2 | .5 |
| 37. | Mesothelioma | 1 | .3 |
| 38. | Molar Pregnancy | 5 | 1.3 |
| 39. | Mycosis Fungoides | 1 | .3 |
| 40. | NHL | 17 | 4.3 |
| 41. | NPH | 24 | 6.1 |
| 42. | NSCLC | 2 | .5 |
| 43. | Oesteosarcoma | 10 | 2.6 |
| 44. | Oropharnx | 2 | .5 |
| 45. | Ovary | 36 | 9.2 |
| 46. | Pancreas | 11 | 2.8 |
| 47. | Perineal Skin SCC | 1 | .3 |
| 48. | Postcricoid | 1 | .3 |
| 49. | Prostate | 1 | .3 |
| 50. | Pseudmyxoma | 1 | .3 |
| 51. | Pyriform | 1 | .3 |
| 52. | Rectum with Liver mets | 2 | .5 |
| 53. | Rt breast | 68 | 17.3 |
| 54. | Sarcoma | 3 | .8 |
| 55. | SCLC | 2 | .5 |
| 56. | Skin | 1 | .3 |
| 57. | Spinal | 1 | .3 |
| 58. | Stomach | 13 | 3.3 |
| 59. | STS Rt glutal | 1 | .3 |
| 60. | STSarcoma | 1 | .3 |
| 61. | Submandible Salivery | 1 | .3 |
| 62. | Testis | 2 | .5 |
| 63. | Tongue | 2 | .5 |
| 64. | Tonsil | 3 | .8 |
| 65. | Uterus | 7 | 1.8 |

**Table 4** Chemotherapy treatment regimens described for the patients in this study.

| **No.** | **Chemotherapy regimen** | **Frequency** | **Percent (%)** |
| --- | --- | --- | --- |
| 1. | 5 Fluorouracil (5FU) | 14 | 3.6 |
| 2. | 5FU/Carboplatin | 8 | 2.0 |
| 3. | 5FU/Cisplatin (CISP) | 41 | 10.5 |
| 4. | 5FU/ Cyclophosphamide (Cyclo) | 2 | .5 |
| 5. | 5FU/Gemcitabine (GEM) | 1 | .3 |
| 6. | 5FU/Methotrexate (MTX)/Cyclo | 2 | .5 |
| 7. | Bleomycin (BLM)/Etoposide/Carboplatin | 2 | .5 |
| 8. | Carboplatin / Etoposide | 1 | .3 |
| 9. | Carboplatin /GEM | 1 | .3 |
| 10. | CISP | 3 | .8 |
| 11. | Docetaxel/5FU | 2 | .5 |
| 12. | Docetaxel/5FU/ CISP | 6 | 1.5 |
| 13. | Docetaxel/ CISP | 1 | .3 |
| 14. | Docetaxel /Cyclo | 11 | 2.8 |
| 15. | Docetaxel | 4 | 1.0 |
| 16. | Doxorubicin (DOXO) | 1 | .3 |
| 17. | DOXO /5FU | 1 | .3 |
| 18. | DOXO /5FU/Cyclo | 14 | 3.6 |
| 19. | DOXO /Capecitabine | 1 | .3 |
| 20. | DOXO / CISP | 16 | 4.1 |
| 21. | DOXO /Cyclo | 45 | 11.5 |
| 22. | DOXO / Docetaxel/Cyclo | 6 | 1.5 |
| 23. | DOXO /Ifosphamide | 4 | 1.0 |
| 24. | Epirubicin (EPI)/5FU | 2 | .5 |
| 25. | EPI /5FU/ CISP | 6 | 1.5 |
| 26. | EPI /5FU/Cyclo | 34 | 8.7 |
| 27. | EPI / CISP | 1 | .3 |
| 28. | Epi/Cyclo | 6 | 1.5 |
| 29. | EPI / Docetaxel | 6 | 1.5 |
| 30. | EPI / Docetaxel /Cyclo | 8 | 2.0 |
| 31. | Etoposide/ CISP | 3 | .8 |
| 32. | Etoposide / CISP /BLM | 7 | 1.8 |
| 33. | Etoposide /Ifosphamide | 1 | .3 |
| 34. | Etoposide /MTX | 5 | 1.3 |
| 35. | Folic Acid (FA)/5FU | 1 | .3 |
| 36. | GEM/Carboplatin | 1 | .3 |
| 37. | GEM / CISP | 2 | .5 |
| 38. | GEM / Docetaxel | 1 | .3 |
| 39. | Gemcitabine | 12 | 3.1 |
| 40. | MTX | 1 | .3 |
| 41. | MTX/Cyclo/FA | 1 | .3 |
| 42. | MTX/FA | 1 | .3 |
| 43. | Oxaliplatin / Capecitabine | 5 | 1.3 |
| 44. | Oxaliplatin/ GEM | 3 | .8 |
| 45. | Paclitaxel / GEM | 2 | .5 |
| 46. | Paclitaxel /Carboplatin/Etoposide | 1 | .3 |
| 47. | Paclitaxel | 5 | 1.3 |
| 48. | Paclitaxel/Carboplatin | 42 | 10.7 |
| 49. | Paclitaxel/ CISP | 2 | .5 |
| 50. | Paclitaxel/Cyclo | 2 | .5 |
| 51. | Vincristine (VCR) | 1 | .3 |
| 52. | VCR/BLM | 1 | .3 |
| 53. | VCR/BLM/ CISP | 1 | .3 |
| 54. | VCR/BLM/Cyclo | 4 | 1.0 |
| 55. | VCR/BLM/Dacarbazine | 1 | .3 |
| 56. | VCR/ CISP | 1 | .3 |
| 57. | VCR/Cyclo | 6 | 1.5 |
| 58. | VCR/ Dacarbazine / CISP | 1 | .3 |
| 59. | VCR/ DOXO | 1 | .3 |
| 60. | VCR/ DOXO /BLM/ Dacarbazine | 1 | .3 |
| 61. | VCR/ DOXO /Cyclo | 16 | 4.1 |
| 62. | VCR/Etoposide/ CISP | 1 | .3 |
| 63. | Venorelbine/Carboplatin | 1 | .3 |
| 64. | Venorelbine/ CISP | 3 | .8 |

**Table 5** Timing and duration for the chemotherapy regimens that induced most oral mucositis in the cancer patients in the current study.

| **No.** | **Regimen type** | **Timing** | **Duration (NO. of cycles)** |
| --- | --- | --- | --- |
| 1 | 5 Fluorouracil (5FU) | Every 3 weeks | 4 - 6 |
| 2 | 5FU/ Cisplatin (CISP) | Every 3 weeks | 4 |
| 3 | Docetaxel/ Cyclophosphamide (Cyclo) | Every 3 weeks | 4 |
| 4 | Doxorubicin (DOXO)/5FU/Cyclo | Every 3 weeks | 6 |
| 5 | DOXO /Cyclo | Every 3 weeks | 4 - 8 |
| 6 | DOXO / Docetaxel /Cyclo | Every 3 weeks | 4 - 6 |
| 7 | DOXO /Ifosphamide | Every 3 weeks | 3 |
| 8 | Epirubicin (EPI) /5FU/ CISP | Every 3 weeks | 4 - 6 |
| 9 | EPI/5FU | Every 3 weeks | 6 |
| 10 | EPI /5FU/Cyclo | Every 3 weeks | 4 - 6 |
| 11 | EPI / Docetaxel /Cyclo | Every 3 weeks | 6 |
| 12 | Etoposide / CISP | Every 3 weeks | 6 |
| 13 | Etoposide / Methotrexate (MTX) | Every 3 weeks | 6 |
| 14 | Gemcitabine (GEM) | 1 – 3 | 8 |
| 15 | Oxaliplatin / Capecitabine | Every 2weeks | 2 |
| 16 | Paclitaxel/Carboplatin | Every 3 weeks | 6 |
| 17 | VCR/Cyclo | Every 3 weeks | 6 |
| 18 | VCR/ DOXO /Cyclo | Every 3 weeks | 6 |

**Table 6** Age frequencies for the participants.

| **Statistics** | | | | | | | | |
| --- | --- | --- | --- | --- | --- | --- | --- | --- |
| **Age** | | | | | | | | |
| N | Valid | | 386 | |
| Missing | | 6 | |
| **Age** | | | | | | | | |
|  | | | | Frequency | | Percent | Valid Percent | Cumulative Percent |
| Valid | | 14 | | 1 | | .3 | .3 | .3 |
| 15 | | 1 | | .3 | .3 | .5 |
| 16 | | 3 | | .8 | .8 | 1.3 |
| 17 | | 3 | | .8 | .8 | 2.1 |
| 18 | | 1 | | .3 | .3 | 2.3 |
| 19 | | 1 | | .3 | .3 | 2.6 |
| 20 | | 3 | | .8 | .8 | 3.4 |
| 22 | | 6 | | 1.5 | 1.6 | 4.9 |
| 23 | | 3 | | .8 | .8 | 5.7 |
| 24 | | 2 | | .5 | .5 | 6.2 |
| 25 | | 2 | | .5 | .5 | 6.7 |
| 26 | | 1 | | .3 | .3 | 7.0 |
| 27 | | 7 | | 1.8 | 1.8 | 8.8 |
| 28 | | 4 | | 1.0 | 1.0 | 9.8 |
| 29 | | 3 | | .8 | .8 | 10.6 |
| 30 | | 4 | | 1.0 | 1.0 | 11.7 |
| 31 | | 3 | | .8 | .8 | 12.4 |
| 32 | | 3 | | .8 | .8 | 13.2 |
| 33 | | 1 | | .3 | .3 | 13.5 |
| 34 | | 1 | | .3 | .3 | 13.7 |
| 35 | | 18 | | 4.6 | 4.7 | 18.4 |
| 36 | | 6 | | 1.5 | 1.6 | 19.9 |
| 37 | | 12 | | 3.1 | 3.1 | 23.1 |
| 38 | | 8 | | 2.0 | 2.1 | 25.1 |
| 39 | | 3 | | .8 | .8 | 25.9 |
| 40 | | 22 | | 5.6 | 5.7 | 31.6 |
| 41 | | 3 | | .8 | .8 | 32.4 |
| 42 | | 13 | | 3.3 | 3.4 | 35.8 |
| 43 | | 4 | | 1.0 | 1.0 | 36.8 |
| 44 | | 2 | | .5 | .5 | 37.3 |
| 45 | | 41 | | 10.5 | 10.6 | 47.9 |
| 46 | | 6 | | 1.5 | 1.6 | 49.5 |
| 47 | | 13 | | 3.3 | 3.4 | 52.8 |
| 48 | | 6 | | 1.5 | 1.6 | 54.4 |
| 49 | | 5 | | 1.3 | 1.3 | 55.7 |
| 50 | | 26 | | 6.6 | 6.7 | 62.4 |
| 51 | | 4 | | 1.0 | 1.0 | 63.5 |
| 52 | | 7 | | 1.8 | 1.8 | 65.3 |
| 53 | | 6 | | 1.5 | 1.6 | 66.8 |
| 54 | | 7 | | 1.8 | 1.8 | 68.7 |
| 55 | | 21 | | 5.4 | 5.4 | 74.1 |
| 56 | | 5 | | 1.3 | 1.3 | 75.4 |
| 57 | | 2 | | .5 | .5 | 75.9 |
| 58 | | 9 | | 2.3 | 2.3 | 78.2 |
| 59 | | 3 | | .8 | .8 | 79.0 |
| 60 | | 19 | | 4.8 | 4.9 | 83.9 |
| 61 | | 2 | | .5 | .5 | 84.5 |
| 62 | | 4 | | 1.0 | 1.0 | 85.5 |
| 63 | | 8 | | 2.0 | 2.1 | 87.6 |
| 64 | | 1 | | .3 | .3 | 87.8 |
| 65 | | 22 | | 5.6 | 5.7 | 93.5 |
| 66 | | 1 | | .3 | .3 | 93.8 |
| 67 | | 2 | | .5 | .5 | 94.3 |
| 68 | | 3 | | .8 | .8 | 95.1 |
| 69 | | 2 | | .5 | .5 | 95.6 |
| 70 | | 6 | | 1.5 | 1.6 | 97.2 |
| 72 | | 1 | | .3 | .3 | 97.4 |
| 73 | | 2 | | .5 | .5 | 97.9 |
| 74 | | 1 | | .3 | .3 | 98.2 |
| 75 | | 2 | | .5 | .5 | 98.7 |
| 76 | | 1 | | .3 | .3 | 99.0 |
| 80 | | 4 | | 1.0 | 1.0 | 100.0 |
| Total | | 386 | | 98.5 | 100.0 |  |
| Missing | | System | | 6 | | 1.5 |  |  |
| Total | | | | 392 | | 100.0 |  |  |

**Table 7** World Health Organization Oral Mucositis Scale, Patient Assessment and Characteristics

| **Grade** | **WHO Scale** | **Week 1** | **Week 2** | **Week 3** | **Week 4** | **Week 5** | **Week 6** |
| --- | --- | --- | --- | --- | --- | --- | --- |
| **0** | No oral mucositis |  |  |  |  |  |  |
| **1** | Soreness +/- erythema |  |  |  |  |  |  |
| **2** | Ulcers; able to eat solids |  |  |  |  |  |  |
| **3** | Ulcers, extensive erythema; patient cannot swallow solid diet |  |  |  |  |  |  |
| **4** | Ulcers; alimentation not possible (due to mucositis) |  |  |  |  |  |  |

Pt.’s name: …………………………………….. Diagnosis: ……………………………………………………………………………

Type of treatment: Radiotherapy Chemotherapy Supportive only Supportive + Gum Arabic

Chemotherapy type: ………………………………….……………, Cycles: C1 …………...….; C2 ………..…; C3 ………; C4 …...…

Total Radiotherapy dose: ………………………………………, Number of fractions: ……………………………..……………………

Duration of treatment: …………………………………; Educational level: ………………………., Occupation: ……………...............

Sex: ………….; Age:………….……; Weight: …………….; Height: ………….; BSA: ……..….. Drug history: ………...…………… Presence any other systemic diseases …………………………………………………………………………...….…………….............

**Table 8** Follow up form for a period of six weeks for each patient (for Gum Arabic treated group).

| No | Patient’s name & Tel. number | Starting date & Quantity issued of Gum Arabic | Date of the next quantity of Gum Arabic | Day & date of weekly follow up by telephone call | | | | | |
| --- | --- | --- | --- | --- | --- | --- | --- | --- | --- |
| W1 | W2 | W3 | W4 | W5 | W6 |
| 1. |  |  |  |  |  |  |  |  |  |
| 2. |  |  |  |  |  |  |  |  |  |
| 3. |  |  |  |  |  |  |  |  |  |
| 4. |  |  |  |  |  |  |  |  |  |
| 5. |  |  |  |  |  |  |  |  |  |
| 6. |  |  |  |  |  |  |  |  |  |
| 7. |  |  |  |  |  |  |  |  |  |
| 8. |  |  |  |  |  |  |  |  |  |
| 9. |  |  |  |  |  |  |  |  |  |
| 10. |  |  |  |  |  |  |  |  |  |
| 11. |  |  |  |  |  |  |  |  |  |
| 12. |  |  |  |  |  |  |  |  |  |
| 13. |  |  |  |  |  |  |  |  |  |
| 14. |  |  |  |  |  |  |  |  |  |
| 15. |  |  |  |  |  |  |  |  |  |
| 16. |  |  |  |  |  |  |  |  |  |
| 17. |  |  |  |  |  |  |  |  |  |
| 18. |  |  |  |  |  |  |  |  |  |
| 19. |  |  |  |  |  |  |  |  |  |
| 20. |  |  |  |  |  |  |  |  |  |

**Table 9** Follow up form for a period of six weeks for each patient (for control group patients).

| No | Patient’s name & Tel. number | Starting date | Day & Date of weekly follow up by telephone call | | | | | |
| --- | --- | --- | --- | --- | --- | --- | --- | --- |
| W1 | W2 | W3 | W4 | W5 | W6 |
| 1. |  |  |  |  |  |  |  |  |
| 2. |  |  |  |  |  |  |  |  |
| 3. |  |  |  |  |  |  |  |  |
| 4. |  |  |  |  |  |  |  |  |
| 5. |  |  |  |  |  |  |  |  |
| 6. |  |  |  |  |  |  |  |  |
| 7. |  |  |  |  |  |  |  |  |
| 8. |  |  |  |  |  |  |  |  |
| 9. |  |  |  |  |  |  |  |  |
| 10. |  |  |  |  |  |  |  |  |
| 11. |  |  |  |  |  |  |  |  |
| 12. |  |  |  |  |  |  |  |  |
| 13. |  |  |  |  |  |  |  |  |
| 14. |  |  |  |  |  |  |  |  |
| 15. |  |  |  |  |  |  |  |  |
| 16. |  |  |  |  |  |  |  |  |
| 17. |  |  |  |  |  |  |  |  |
| 18. |  |  |  |  |  |  |  |  |
| 19. |  |  |  |  |  |  |  |  |
| 20. |  |  |  |  |  |  |  |  |

Rawaa consent to participate in the study (her age was 14 years):


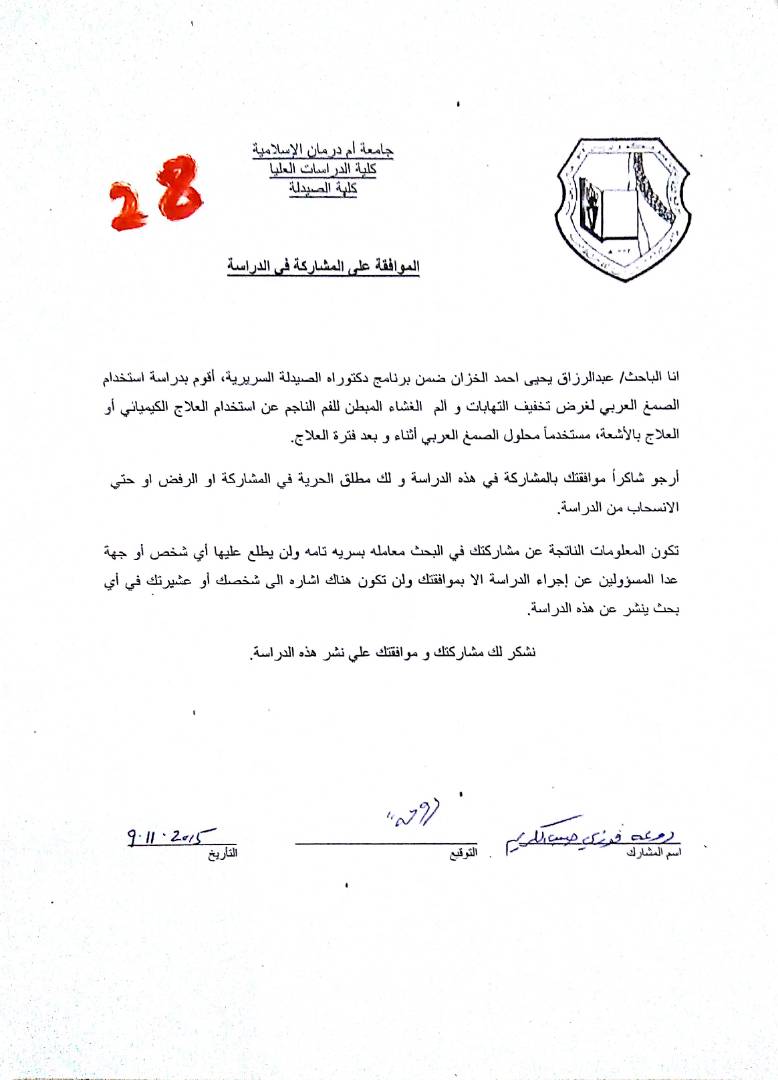


Manahil consent to participate in the study (her age was 15 years):


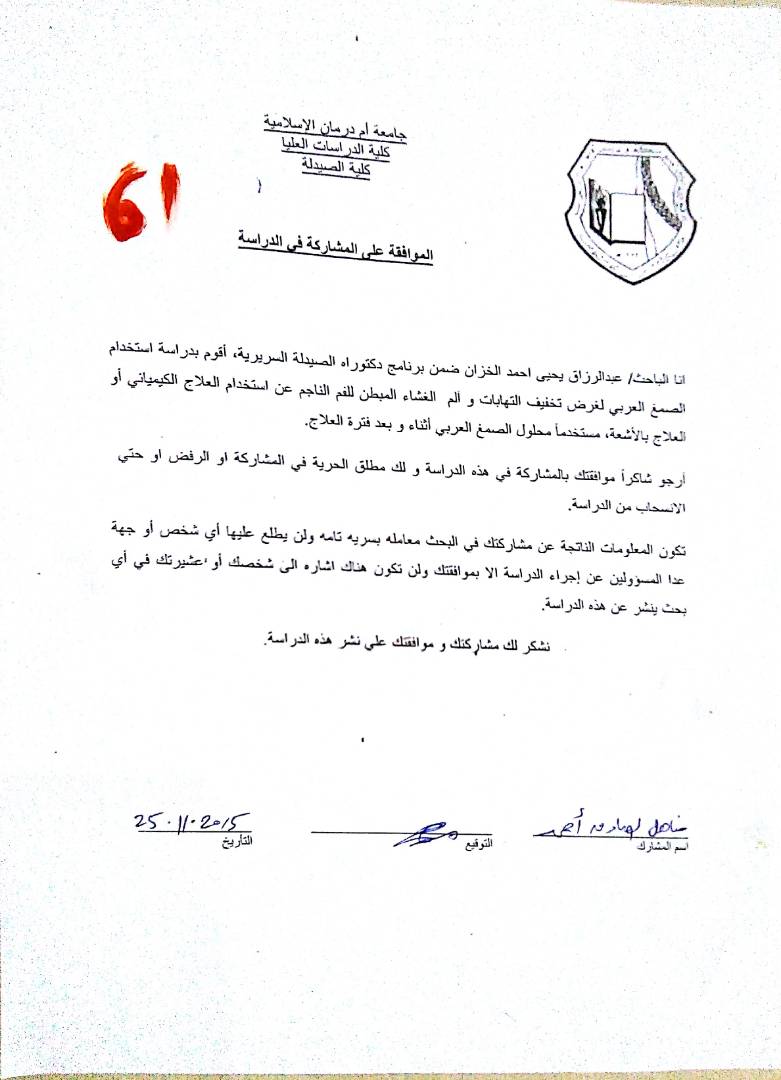

Supplement: Supplementary file 1 [file 97bf9fade41a919b20679b29.docx]
